# Supplementary material
Source: publisher figshare collection journal article supplement (https://frontiersin.figshare.com/ndownloader/files/28447863)
Supplement: Supplementary file [file 28447863]

Supplementary Material 9

Supplementary Material 9: Trends in salience and sentiment for keywords per fortnight in Twitter data (Study 2).

| Keyword                                                                                | Fortnight starting | Fortnight to lockdown | Time window     | Salience             |                | Total N         |                | Count of sentiments  |     |     | Proportion of sentiments |      |      | Count of sentiments |     |     | Proportion of sentiments |      |      |
|----------------------------------------------------------------------------------------|--------------------|-----------------------|-----------------|----------------------|----------------|-----------------|----------------|----------------------|-----|-----|--------------------------|------|------|---------------------|-----|-----|--------------------------|------|------|
|                                                                                        |                    |                       |                 | Original tweets only | Incl. Retweets | Original tweets | Incl. Retweets | Original tweets only |     |     | Original tweets only     |      |      | Incl. Retweets      |     |     | Incl. Retweets           |      |      |
|                                                                                        |                    |                       |                 |                      |                |                 |                | Neu                  | Pos | Neg | Neu                      | Pos  | Neg  | Neu                 | Pos | Neg | Neu                      | Neg  | Pos  |
|                                                                                        |                    |                       |                 |                      |                |                 |                |                      |     |     |                          |      |      |                     |     |     |                          |      |      |
| Behaviour change                                                                       | 2020-02-24         | -2                    | before-lockdown | 0.30                 | 0.13           | 23              | 43             | 12                   | 10  | 1   | 0.52                     | 0.43 | 0.04 | 28                  | 14  | 1   | 0.65                     | 0.02 | 0.33 |
|                                                                                        | 2020-03-09         | -1                    |                 | 0.17                 | 0.07           | 93              | 328            | 40                   | 49  | 4   | 0.43                     | 0.53 | 0.04 | 125                 | 198 | 5   | 0.38                     | 0.02 | 0.6  |
|                                                                                        | 2020-03-23         | 0                     |                 | 0.32                 | 0.11           | 92              | 264            | 49                   | 41  | 2   | 0.53                     | 0.45 | 0.02 | 148                 | 110 | 6   | 0.56                     | 0.02 | 0.42 |
|                                                                                        | 2020-04-06         | 1                     | lockdown        | 0.48                 | 0.46           | 147             | 535            | 92                   | 53  | 2   | 0.63                     | 0.36 | 0.01 | 190                 | 343 | 2   | 0.36                     | 0    | 0.64 |
|                                                                                        | 2020-04-20         | 2                     |                 | 0.41                 | 0.50           | 110             | 542            | 54                   | 54  | 2   | 0.49                     | 0.49 | 0.02 | 148                 | 382 | 12  | 0.27                     | 0.02 | 0.7  |
|                                                                                        | 2020-05-04         | 3                     |                 | 0.35                 | 0.36           | 122             | 578            | 57                   | 65  |     | 0.47                     | 0.53 |      | 336                 | 242 |     | 0.58                     |      | 0.42 |
|                                                                                        | 2020-05-18         | 4                     | post-lockdown   | 0.38                 | 0.22           | 78              | 337            | 40                   | 35  | 3   | 0.51                     | 0.45 | 0.04 | 111                 | 222 | 4   | 0.33                     | 0.01 | 0.66 |
| Behavioural economics (behavioural economists)                                         | 2020-06-01         | 5                     |                 | 0.32                 | 0.26           | 44              | 116            | 18                   | 25  | 1   | 0.41                     | 0.57 | 0.02 | 49                  | 65  | 2   | 0.42                     | 0.02 | 0.56 |
|                                                                                        | 2020-02-24         | -2                    | before-lockdown | 0.04                 | 0.01           | 3               | 3              | 1                    | 1   | 1   | 0.33                     | 0.33 | 0.33 | 1                   | 1   | 1   | 0.33                     | 0.33 | 0.33 |
|                                                                                        | 2020-03-09         | -1                    |                 | 0.03                 | 0.02           | 15              | 81             | 8                    | 4   | 3   | 0.53                     | 0.27 | 0.2  | 16                  | 29  | 36  | 0.2                      | 0.44 | 0.36 |
|                                                                                        | 2020-03-23         | 0                     |                 | 0.03                 | 0.01           | 9               | 25             | 6                    | 3   |     | 0.67                     | 0.33 |      | 17                  | 8   |     | 0.68                     |      | 0.32 |
|                                                                                        | 2020-04-06         | 1                     | lockdown        | 0.03                 | 0.02           | 8               | 18             | 7                    | 1   |     | 0.88                     | 0.12 |      | 16                  | 2   |     | 0.89                     |      | 0.11 |
|                                                                                        | 2020-04-20         | 2                     |                 | 0.06                 | 0.03           | 16              | 34             | 7                    | 5   | 4   | 0.44                     | 0.31 | 0.25 | 16                  | 5   | 13  | 0.47                     | 0.38 | 0.15 |
|                                                                                        | 2020-05-04         | 3                     |                 | 0.02                 | 0.01           | 8               | 23             | 6                    |     | 2   | 0.75                     |      | 0.25 | 21                  |     | 2   | 0.91                     | 0.09 |      |
| Behavioural Insights Team (nudge unit)                                                 | 2020-05-18         | 4                     | post-lockdown   | 0.01                 | 0.01           | 3               | 8              | 2                    | 1   |     | 0.67                     | 0.33 |      | 5                   | 3   |     | 0.62                     |      | 0.38 |
|                                                                                        | 2020-06-01         | 5                     |                 | 0.04                 | 0.01           | 5               | 6              | 4                    | 1   |     | 0.8                      | 0.2  |      | 5                   | 1   |     | 0.83                     |      | 0.17 |
|                                                                                        | 2020-02-24         | -2                    | before-lockdown | 0.01                 | 0.00           | 1               | 1              | 1                    |     |     | 1                        |      |      | 1                   |     |     | 1                        |      |      |
|                                                                                        | 2020-03-09         | -1                    |                 | 0.16                 | 0.16           | 89              | 765            | 34                   | 5   | 50  | 0.38                     | 0.06 | 0.56 | 250                 | 33  | 482 | 0.33                     | 0.63 | 0.04 |
|                                                                                        | 2020-03-23         | 0                     |                 | 0.13                 | 0.29           | 37              | 677            | 11                   | 3   | 23  | 0.3                      | 0.08 | 0.62 | 70                  | 12  | 595 | 0.1                      | 0.88 | 0.02 |
|                                                                                        | 2020-04-06         | 1                     | lockdown        | 0.10                 | 0.12           | 32              | 136            | 2                    | 4   | 26  | 0.06                     | 0.12 | 0.81 | 25                  | 5   | 106 | 0.18                     | 0.78 | 0.04 |
|                                                                                        | 2020-04-20         | 2                     |                 | 0.04                 | 0.09           | 12              | 94             | 8                    |     | 4   | 0.67                     |      | 0.33 | 15                  |     | 79  | 0.16                     | 0.84 |      |
| Behavioural science (behavioural sciences, behavioural policy, behavioural scientists) | 2020-05-04         | 3                     |                 | 0.10                 | 0.16           | 34              | 256            | 16                   | 2   | 16  | 0.47                     | 0.06 | 0.47 | 102                 | 17  | 137 | 0.4                      | 0.54 | 0.07 |
|                                                                                        | 2020-05-18         | 4                     | post-lockdown   | 0.03                 | 0.05           | 7               | 80             | 2                    | 1   | 4   | 0.29                     | 0.14 | 0.57 | 4                   | 3   | 73  | 0.05                     | 0.91 | 0.04 |
|                                                                                        | 2020-06-01         | 5                     |                 | 0.06                 | 0.04           | 8               | 17             | 2                    |     | 6   | 0.25                     |      | 0.75 | 4                   |     | 13  | 0.24                     | 0.76 |      |
|                                                                                        | 2020-02-24         | -2                    | before-lockdown | 0.29                 | 0.36           | 22              | 120            | 10                   | 12  |     | 0.45                     | 0.55 |      | 65                  | 55  |     | 0.54                     |      | 0.46 |
|                                                                                        | 2020-03-09         | -1                    |                 | 0.28                 | 0.15           | 157             | 751            | 58                   | 43  | 56  | 0.37                     | 0.27 | 0.36 | 393                 | 122 | 236 | 0.52                     | 0.31 | 0.16 |
|                                                                                        | 2020-03-23         | 0                     |                 | 0.29                 | 0.43           | 84              | 990            | 40                   | 32  | 12  | 0.48                     | 0.38 | 0.14 | 736                 | 216 | 38  | 0.74                     | 0.04 | 0.22 |
|                                                                                        | 2020-04-06         | 1                     | lockdown        | 0.25                 | 0.27           | 77              | 317            | 28                   | 41  | 8   | 0.36                     | 0.53 | 0.1  | 68                  | 218 | 31  | 0.21                     | 0.1  | 0.69 |
| Behavioural scientist                                                                  | 2020-04-20         | 2                     |                 | 0.27                 | 0.20           | 73              | 217            | 24                   | 40  | 9   | 0.33                     | 0.55 | 0.12 | 71                  | 84  | 62  | 0.33                     | 0.29 | 0.39 |
|                                                                                        | 2020-05-04         | 3                     |                 | 0.26                 | 0.20           | 91              | 325            | 31                   | 42  | 18  | 0.34                     | 0.46 | 0.2  | 102                 | 117 | 106 | 0.31                     | 0.33 | 0.36 |
|                                                                                        | 2020-05-18         | 4                     | post-lockdown   | 0.33                 | 0.13           | 68              | 206            | 53                   | 14  | 1   | 0.78                     | 0.21 | 0.01 | 159                 | 43  | 4   | 0.77                     | 0.02 | 0.21 |
|                                                                                        | 2020-06-01         | 5                     |                 | 0.26                 | 0.36           | 36              | 160            | 11                   | 23  | 2   | 0.31                     | 0.64 | 0.06 | 32                  | 123 | 5   | 0.2                      | 0.03 | 0.77 |
|                                                                                        | 2020-02-24         | -2                    | before-lockdown | 0.01                 | 0.00           | 1               | 1              |                      |     | 1   |                          |      | 1    |                     |     | 1   |                          | 1    |      |
|                                                                                        | 2020-03-09         | -1                    |                 | 0.05                 | 0.07           | 27              | 340            | 11                   |     | 16  | 0.41                     |      | 0.59 | 228                 |     | 112 | 0.67                     | 0.33 |      |
|                                                                                        | 2020-03-23         | 0                     |                 | 0.03                 | 0.04           | 8               | 100            | 3                    | 1   | 4   | 0.38                     | 0.12 | 0.5  | 68                  | 1   | 31  | 0.68                     | 0.31 | 0.01 |
| Halpern                                                                                | 2020-04-06         | 1                     | lockdown        | 0.01                 | 0.02           | 4               | 18             | 4                    |     |     | 1                        |      |      | 18                  |     |     | 1                        |      |      |
|                                                                                        | 2020-04-20         | 2                     |                 | 0.01                 | 0.01           | 2               | 11             | 1                    |     | 1   | 0.5                      |      | 0.5  | 1                   |     | 10  | 0.09                     | 0.91 |      |
|                                                                                        | 2020-05-04         | 3                     |                 | 0.01                 | 0.00           | 4               | 7              | 2                    |     | 2   | 0.5                      |      | 0.5  | 4                   |     | 3   | 0.57                     | 0.43 |      |
|                                                                                        | 2020-05-18         | 4                     | post-lockdown   | 0.02                 | 0.02           | 4               | 31             | 3                    |     | 1   | 0.75                     |      | 0.25 | 30                  |     | 1   | 0.97                     | 0.03 |      |
|                                                                                        | 2020-06-01         | 5                     |                 | 0.01                 | 0.09           | 1               | 39             | 1                    |     |     | 1                        |      |      | 39                  |     |     | 1                        |      |      |
|                                                                                        | 2020-02-24         | -2                    | before-lockdown | 0.01                 | 0.00           | 1               | 1              |                      | 1   |     | 1                        |      | 1    |                     | 1   |     |                          |      | 1    |
|                                                                                        | 2020-03-09         | -1                    |                 | 0.10                 | 0.12           | 53              | 588            | 15                   | 3   | 35  | 0.28                     | 0.06 | 0.66 | 141                 | 3   | 444 | 0.24                     | 0.76 | 0.01 |
|                                                                                        | 2020-03-23         | 0                     |                 | 0.03                 | 0.03           | 9               | 78             | 1                    |     | 8   | 0.11                     |      | 0.89 | 5                   |     | 73  | 0.06                     | 0.94 |      |
|                                                                                        | 2020-04-06         | 1                     | lockdown        | 0.04                 | 0.06           | 13              | 75             | 2                    | 1   | 10  | 0.15                     | 0.08 | 0.77 | 25                  | 1   | 49  | 0.33                     | 0.65 | 0.01 |
|                                                                                        | 2020-04-20         | 2                     |                 | 0.04                 | 0.05           | 10              | 59             | 5                    |     | 5   | 0.5                      |      | 0.5  | 22                  |     | 37  | 0.37                     | 0.63 |      |
|                                                                                        | 2020-05-04         | 3                     |                 | 0.02                 | 0.03           | 7               | 41             | 2                    | 1   | 4   | 0.29                     | 0.14 | 0.57 | 17                  | 7   | 17  | 0.41                     | 0.41 | 0.17 |
|                                                                                        | 2020-05-18         | 4                     | post-lockdown   | 0.02                 | 0.04           | 5               | 63             | 1                    |     | 4   | 0.2                      |      | 0.8  | 2                   |     | 61  | 0.03                     | 0.97 |      |
|                                                                                        | 2020-06-01         | 5                     |                 | 0.01                 | 0.00           | 1               | 1              |                      |     | 1   |                          |      | 1    |                     |     | 1   |                          | 1    |      |
|                                                                                        | 2020-02-24         | -2                    | before-lockdown | 0.25                 | 0.55           | 19              | 180            | 11                   | 8   |     | 0.58                     | 0.42 |      | 139                 | 41  |     | 0.77                     |      | 0.23 |

# Supplementary Material 9

Supplementary Material 9: Trends in salience and sentiment for keywords per fortnight in Twitter data (Study 2).

| Keyword                                                                                              | Fortnight starting | Fortnight to lockdown | Time window     | Salience             |                | Total N         |                | Count of sentiments  |     |     | Proportion of sentiments |      |      | Count of sentiments |     |      | Proportion of sentiments |      |      |
|------------------------------------------------------------------------------------------------------|--------------------|-----------------------|-----------------|----------------------|----------------|-----------------|----------------|----------------------|-----|-----|--------------------------|------|------|---------------------|-----|------|--------------------------|------|------|
|                                                                                                      |                    |                       |                 | Original tweets only | Incl. Retweets | Original tweets | Incl. Retweets | Original tweets only |     |     | Original tweets only     |      |      | Incl. Retweets      |     |      | Incl. Retweets           |      |      |
|                                                                                                      |                    |                       |                 |                      |                |                 |                | Neu                  | Pos | Neg | Neu                      | Pos  | Neg  | Neu                 | Pos | Neg  | Neu                      | Neg  | Pos  |
|                                                                                                      |                    |                       |                 |                      |                |                 |                |                      |     |     |                          |      |      |                     |     |      |                          |      |      |
| Michie                                                                                               | 2020-03-09         | -1                    | before-lockdown | 0.09                 | 0.08           | 51              | 372            | 26                   | 24  | 1   | 0.51                     | 0.47 | 0.02 | 200                 | 170 | 2    | 0.54                     | 0.01 | 0.46 |
|                                                                                                      | 2020-03-23         | 0                     |                 | 0.06                 | 0.04           | 17              | 96             | 14                   | 2   | 1   | 0.82                     | 0.12 | 0.06 | 91                  | 4   | 1    | 0.95                     | 0.01 | 0.04 |
|                                                                                                      | 2020-04-06         | 1                     | lockdown        | 0.04                 | 0.04           | 12              | 43             | 4                    | 7   | 1   | 0.33                     | 0.58 | 0.08 | 16                  | 26  | 1    | 0.37                     | 0.02 | 0.6  |
|                                                                                                      | 2020-04-20         | 2                     |                 | 0.06                 | 0.09           | 16              | 98             | 10                   | 5   | 1   | 0.62                     | 0.31 | 0.06 | 62                  | 35  | 1    | 0.63                     | 0.01 | 0.36 |
|                                                                                                      | 2020-05-04         | 3                     |                 | 0.14                 | 0.18           | 49              | 283            | 30                   | 16  | 3   | 0.61                     | 0.33 | 0.06 | 179                 | 101 | 3    | 0.63                     | 0.01 | 0.36 |
|                                                                                                      | 2020-05-18         | 4                     | post-lockdown   | 0.14                 | 0.52           | 29              | 800            | 23                   | 5   | 1   | 0.79                     | 0.17 | 0.03 | 782                 | 17  | 1    | 0.98                     | 0    | 0.02 |
|                                                                                                      | 2020-06-01         | 5                     |                 | 0.29                 | 0.20           | 39              | 87             | 37                   | 2   |     | 0.95                     | 0.05 |      | 84                  | 3   |      | 0.97                     |      | 0.03 |
| Nudge                                                                                                | 2020-02-24         | -2                    | before-lockdown | 0.04                 | 0.02           | 3               | 5              |                      | 2   | 1   |                          | 0.67 | 0.33 |                     | 4   | 1    |                          | 0.2  | 0.8  |
| (nudges, nudging, nudge theory, nudge strategy, paternalism, libertarian paternalism, paternalistic) | 2020-03-09         | -1                    |                 | 0.18                 | 0.30           | 101             | 1460           | 32                   | 18  | 51  | 0.32                     | 0.18 | 0.5  | 77                  | 52  | 1331 | 0.05                     | 0.91 | 0.04 |
|                                                                                                      | 2020-03-23         | 0                     |                 | 0.11                 | 0.03           | 33              | 76             | 14                   | 8   | 11  | 0.42                     | 0.24 | 0.33 | 28                  | 13  | 35   | 0.37                     | 0.46 | 0.17 |
|                                                                                                      | 2020-04-06         | 1                     | lockdown        | 0.05                 | 0.02           | 16              | 28             | 2                    | 5   | 9   | 0.12                     | 0.31 | 0.56 | 8                   | 5   | 15   | 0.29                     | 0.54 | 0.18 |
|                                                                                                      | 2020-04-20         | 2                     |                 | 0.12                 | 0.10           | 33              | 109            | 9                    | 6   | 18  | 0.27                     | 0.18 | 0.55 | 26                  | 11  | 72   | 0.24                     | 0.66 | 0.1  |
|                                                                                                      | 2020-05-04         | 3                     |                 | 0.08                 | 0.05           | 29              | 76             | 13                   | 5   | 11  | 0.45                     | 0.17 | 0.38 | 38                  | 13  | 25   | 0.5                      | 0.33 | 0.17 |
|                                                                                                      | 2020-05-18         | 4                     | post-lockdown   | 0.06                 | 0.02           | 12              | 31             | 3                    | 8   | 1   | 0.25                     | 0.67 | 0.08 | 10                  | 17  | 4    | 0.32                     | 0.13 | 0.55 |
|                                                                                                      | 2020-06-01         | 5                     |                 | 0.03                 | 0.02           | 4               | 7              | 2                    | 2   |     | 0.5                      | 0.5  |      | 4                   | 3   |      | 0.57                     |      | 0.43 |
| Choice architecture (choice architect)                                                               | 2020-02-24         | -2                    | before-lockdown | 0.00                 | 0.00           | 0               | 0              |                      |     |     |                          |      |      |                     |     |      |                          |      |      |
|                                                                                                      | 2020-03-09         | -1                    |                 | 0.01                 | 0.00           | 5               | 10             | 3                    | 2   |     | 0.6                      | 0.4  |      | 6                   | 4   |      | 0.6                      |      | 0.4  |
|                                                                                                      | 2020-03-23         | 0                     |                 | 0.01                 | 0.00           | 2               | 2              | 1                    | 1   |     | 0.5                      | 0.5  |      | 1                   | 1   |      | 0.5                      |      | 0.5  |
|                                                                                                      | 2020-04-06         | 1                     | lockdown        | 0.00                 | 0.00           | 0               | 0              |                      |     |     |                          |      |      |                     |     |      |                          |      |      |
|                                                                                                      | 2020-04-20         | 2                     |                 | 0.01                 | 0.01           | 3               | 7              |                      | 3   |     |                          | 1    |      |                     | 7   |      |                          |      | 1    |
|                                                                                                      | 2020-05-04         | 3                     |                 | 0.00                 | 0.00           | 0               | 0              |                      |     |     |                          |      |      |                     |     |      |                          |      |      |
|                                                                                                      | 2020-05-18         | 4                     | post-lockdown   | 0.00                 | 0.00           | 0               | 0              |                      |     |     |                          |      |      |                     |     |      |                          |      |      |
|                                                                                                      | 2020-06-01         | 5                     |                 | 0.00                 | 0.00           | 0               | 0              |                      |     |     |                          |      |      |                     |     |      |                          |      |      |
| Psychologist                                                                                         | 2020-02-24         | -2                    | before-lockdown | 0.01                 | 0.00           | 1               | 1              | 1                    |     |     | 1                        |      |      | 1                   |     |      | 1                        |      |      |
|                                                                                                      | 2020-03-09         | -1                    |                 | 0.06                 | 0.37           | 32              | 1796           | 3                    | 2   | 27  | 0.09                     | 0.06 | 0.84 | 15                  | 2   | 1779 | 0.01                     | 0.99 | 0    |
|                                                                                                      | 2020-03-23         | 0                     |                 | 0.02                 | 0.02           | 5               | 54             | 2                    |     | 3   | 0.4                      |      | 0.6  | 7                   |     | 47   | 0.13                     | 0.87 |      |
|                                                                                                      | 2020-04-06         | 1                     | lockdown        | 0.01                 | 0.00           | 2               | 4              |                      |     | 2   |                          |      | 1    |                     | 4   |      |                          | 1    |      |
|                                                                                                      | 2020-04-20         | 2                     |                 | 0.00                 | 0.00           | 1               | 4              | 1                    |     |     | 1                        |      |      | 4                   |     |      | 1                        |      |      |
|                                                                                                      | 2020-05-04         | 3                     |                 | 0.01                 | 0.00           | 3               | 4              | 1                    | 2   |     | 0.33                     | 0.67 |      | 2                   | 2   |      | 0.5                      |      | 0.5  |
|                                                                                                      | 2020-05-18         | 4                     | post-lockdown   | 0.00                 | 0.00           | 0               | 0              |                      |     |     |                          |      |      |                     |     |      |                          |      |      |
|                                                                                                      | 2020-06-01         | 5                     |                 | 0.00                 | 0.00           | 0               | 0              |                      |     |     |                          |      |      |                     |     |      |                          |      |      |
| Psychology (psychologists, psychological science, psychological policy)                              | 2020-02-24         | -2                    | before-lockdown | 0.14                 | 0.32           | 11              | 107            | 5                    | 6   |     | 0.45                     | 0.55 |      | 63                  | 44  |      | 0.59                     |      | 0.41 |
|                                                                                                      | 2020-03-09         | -1                    |                 | 0.06                 | 0.11           | 32              | 514            | 12                   | 5   | 15  | 0.38                     | 0.16 | 0.47 | 92                  | 16  | 406  | 0.18                     | 0.79 | 0.03 |
|                                                                                                      | 2020-03-23         | 0                     |                 | 0.07                 | 0.05           | 21              | 120            | 12                   | 8   | 1   | 0.57                     | 0.38 | 0.05 | 32                  | 44  | 44   | 0.27                     | 0.37 | 0.37 |
|                                                                                                      | 2020-04-06         | 1                     | lockdown        | 0.06                 | 0.13           | 19              | 155            | 7                    | 8   | 4   | 0.37                     | 0.42 | 0.21 | 48                  | 86  | 21   | 0.31                     | 0.14 | 0.55 |
|                                                                                                      | 2020-04-20         | 2                     |                 | 0.09                 | 0.17           | 23              | 185            | 6                    | 14  | 3   | 0.26                     | 0.61 | 0.13 | 29                  | 153 | 3    | 0.16                     | 0.02 | 0.83 |
|                                                                                                      | 2020-05-04         | 3                     |                 | 0.08                 | 0.10           | 29              | 165            | 10                   | 15  | 4   | 0.34                     | 0.52 | 0.14 | 39                  | 91  | 35   | 0.24                     | 0.21 | 0.55 |
|                                                                                                      | 2020-05-18         | 4                     | post-lockdown   | 0.05                 | 0.03           | 11              | 45             | 8                    | 2   | 1   | 0.73                     | 0.18 | 0.09 | 16                  | 25  | 4    | 0.36                     | 0.09 | 0.56 |
|                                                                                                      | 2020-06-01         | 5                     |                 | 0.24                 | 0.19           | 32              | 83             | 29                   | 3   |     | 0.91                     | 0.09 |      | 54                  | 29  |      | 0.65                     |      | 0.35 |
| SPI-B                                                                                                | 2020-02-24         | -2                    | before-lockdown | 0.00                 | 0.00           | 0               | 0              |                      |     |     |                          |      |      |                     |     |      |                          |      |      |
|                                                                                                      | 2020-03-09         | -1                    |                 | 0.00                 | 0.00           | 0               | 0              |                      |     |     |                          |      |      |                     |     |      |                          |      |      |
|                                                                                                      | 2020-03-23         | 0                     |                 | 0.00                 | 0.00           | 1               | 2              | 1                    |     |     | 1                        |      |      | 2                   |     |      | 1                        |      |      |
|                                                                                                      | 2020-04-06         | 1                     | lockdown        | 0.00                 | 0.00           | 0               | 0              |                      |     |     |                          |      |      |                     |     |      |                          |      |      |
|                                                                                                      | 2020-04-20         | 2                     |                 | 0.00                 | 0.00           | 0               | 0              |                      |     |     |                          |      |      |                     |     |      |                          |      |      |
|                                                                                                      | 2020-05-04         | 3                     |                 | 0.00                 | 0.00           | 1               | 2              |                      |     | 1   |                          |      | 1    |                     |     | 2    |                          | 1    |      |
|                                                                                                      | 2020-05-18         | 4                     | post-lockdown   | 0.01                 | 0.00           | 3               | 4              | 1                    |     | 2   | 0.33                     |      | 0.67 | 1                   |     | 3    | 0.25                     | 0.75 |      |
|                                                                                                      | 2020-06-01         | 5                     |                 | 0.00                 | 0.00           | 0               | 0              |                      |     |     |                          |      |      |                     |     |      |                          |      |      |
